# Supplementary material
Source: Springer Nature journal article supplement (https://www.springermedizin.de/resource/supplementary/12889_2011_4137_MOESM1_ESM.pdf/9492060)

Figure 1: Beliefs in causes of mental illness

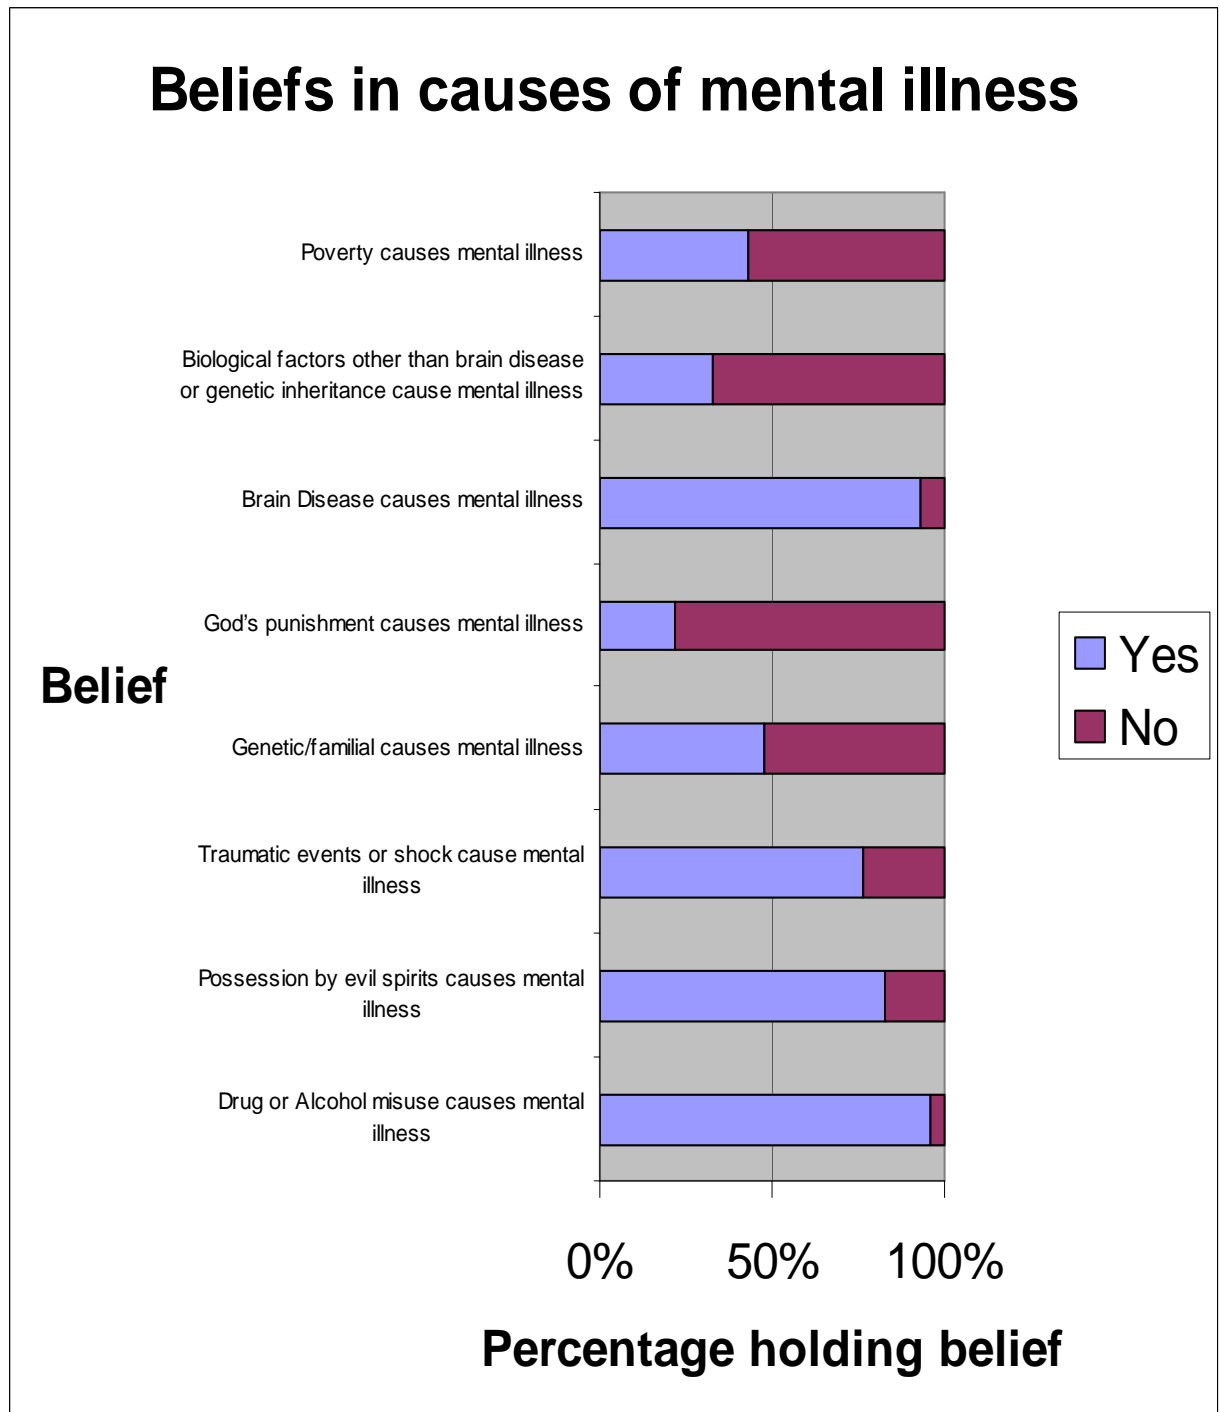

Supplement: MOESM1 [file 9492060]
